# Supplementary figures and images for: Evolution and Epidemic Spread of SARS-CoV-2 in Colombia: A Year into the Pandemic (part 2 of 2)
Source: MDPI journal article supplement (doi:10.3390/vaccines9080837), 2021-07-30

Estimated R

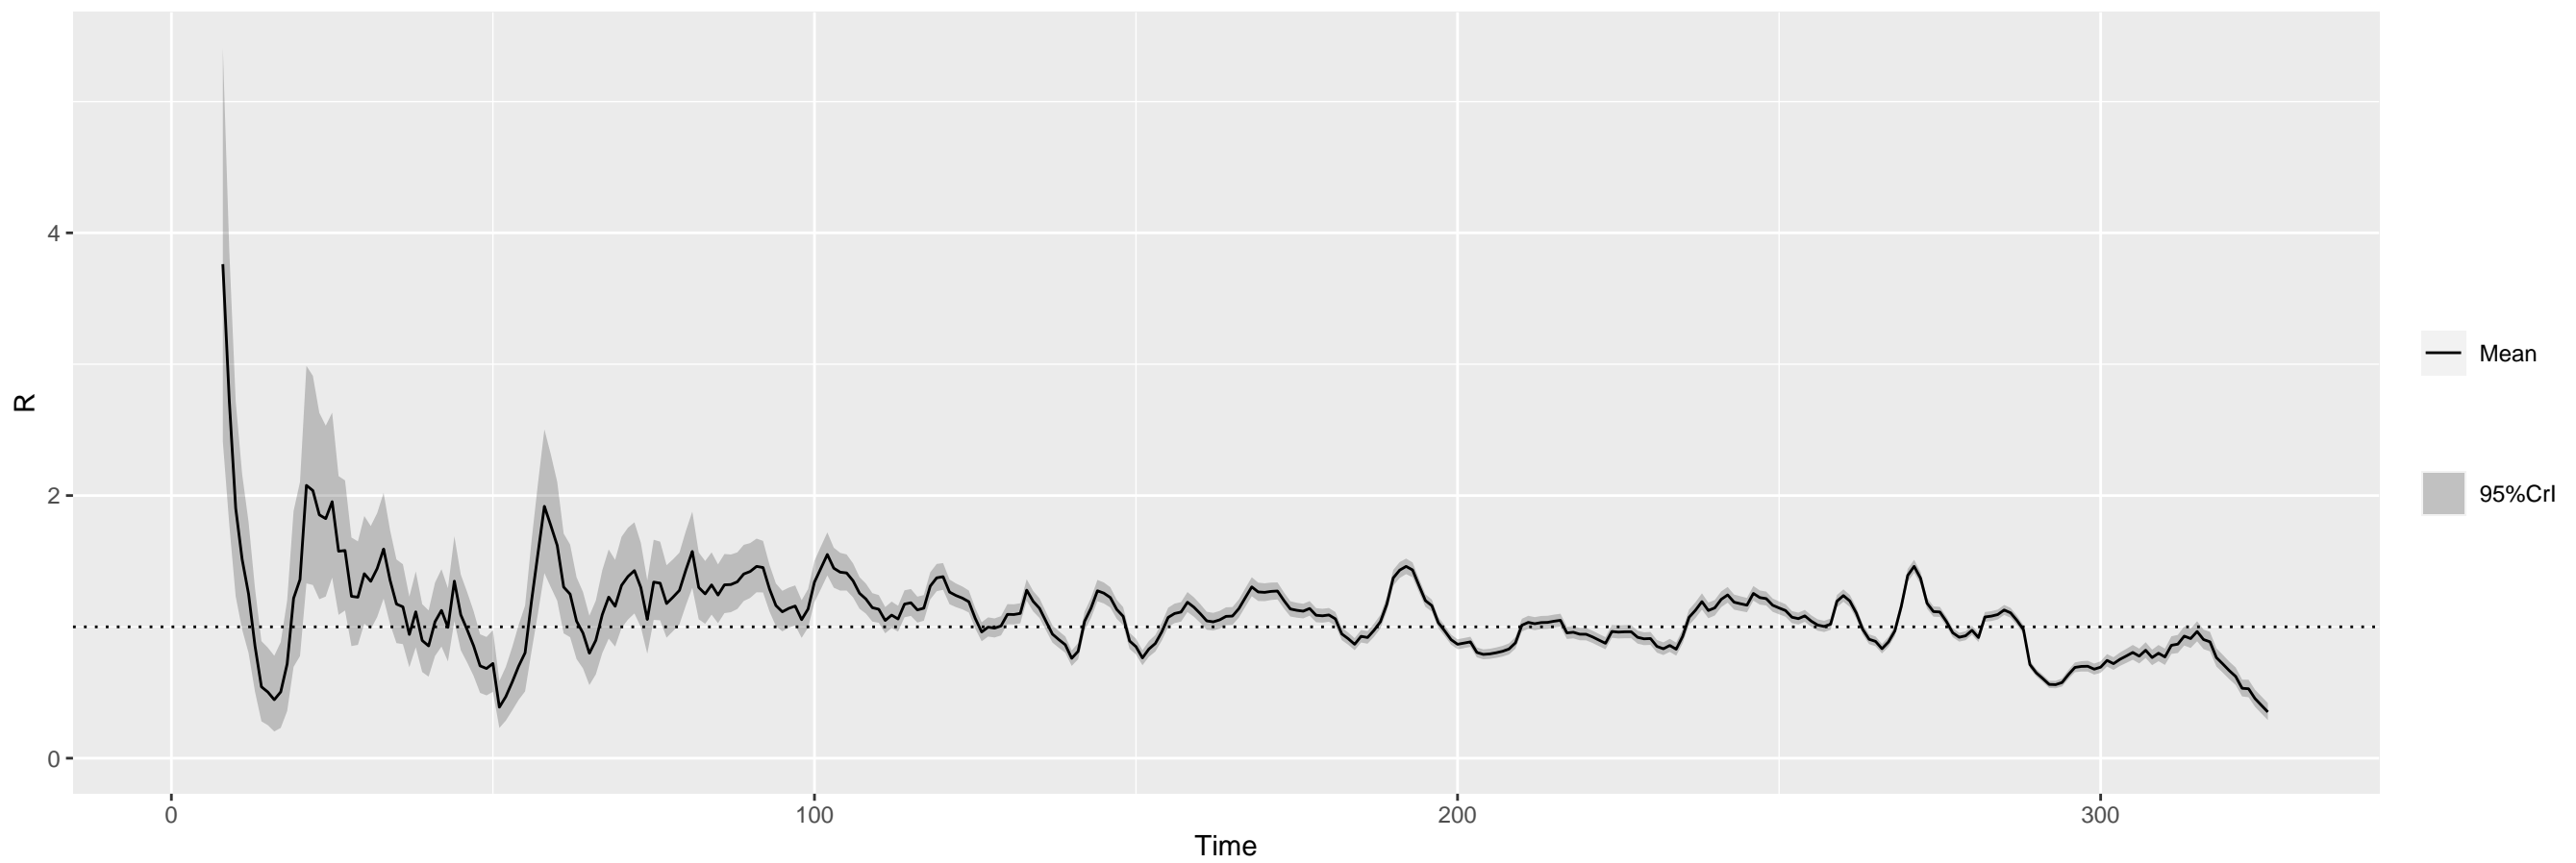

Epidemic curve

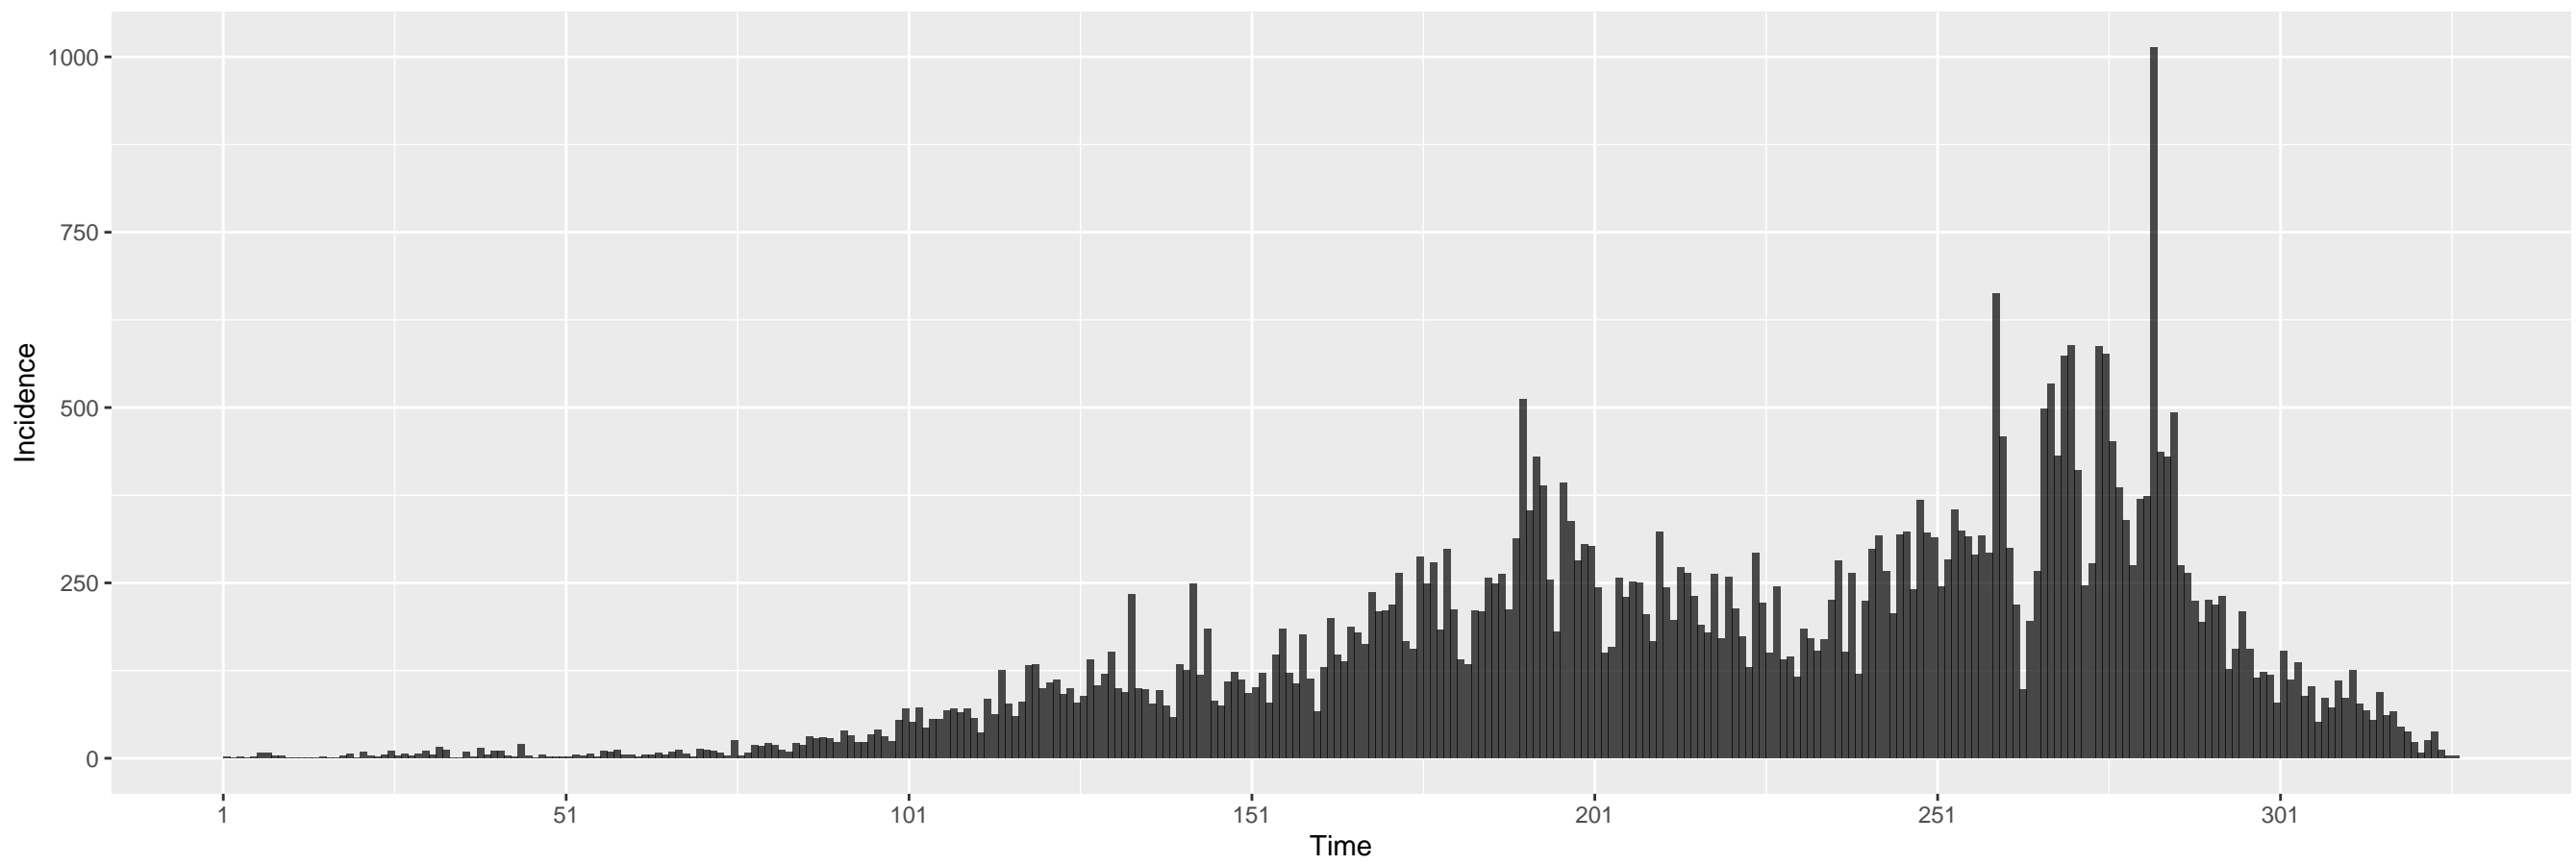

Supplement: s1 [file s1]
